# Supplementary figures and images for: Modeling the formation and properties of traditional and non-traditional secondary organic aerosol: problem formulation and application to aircraft exhaust
Source: Copernicus journal article supplement (doi:10.5194/acp-12-9025-2012), 2012-10-04

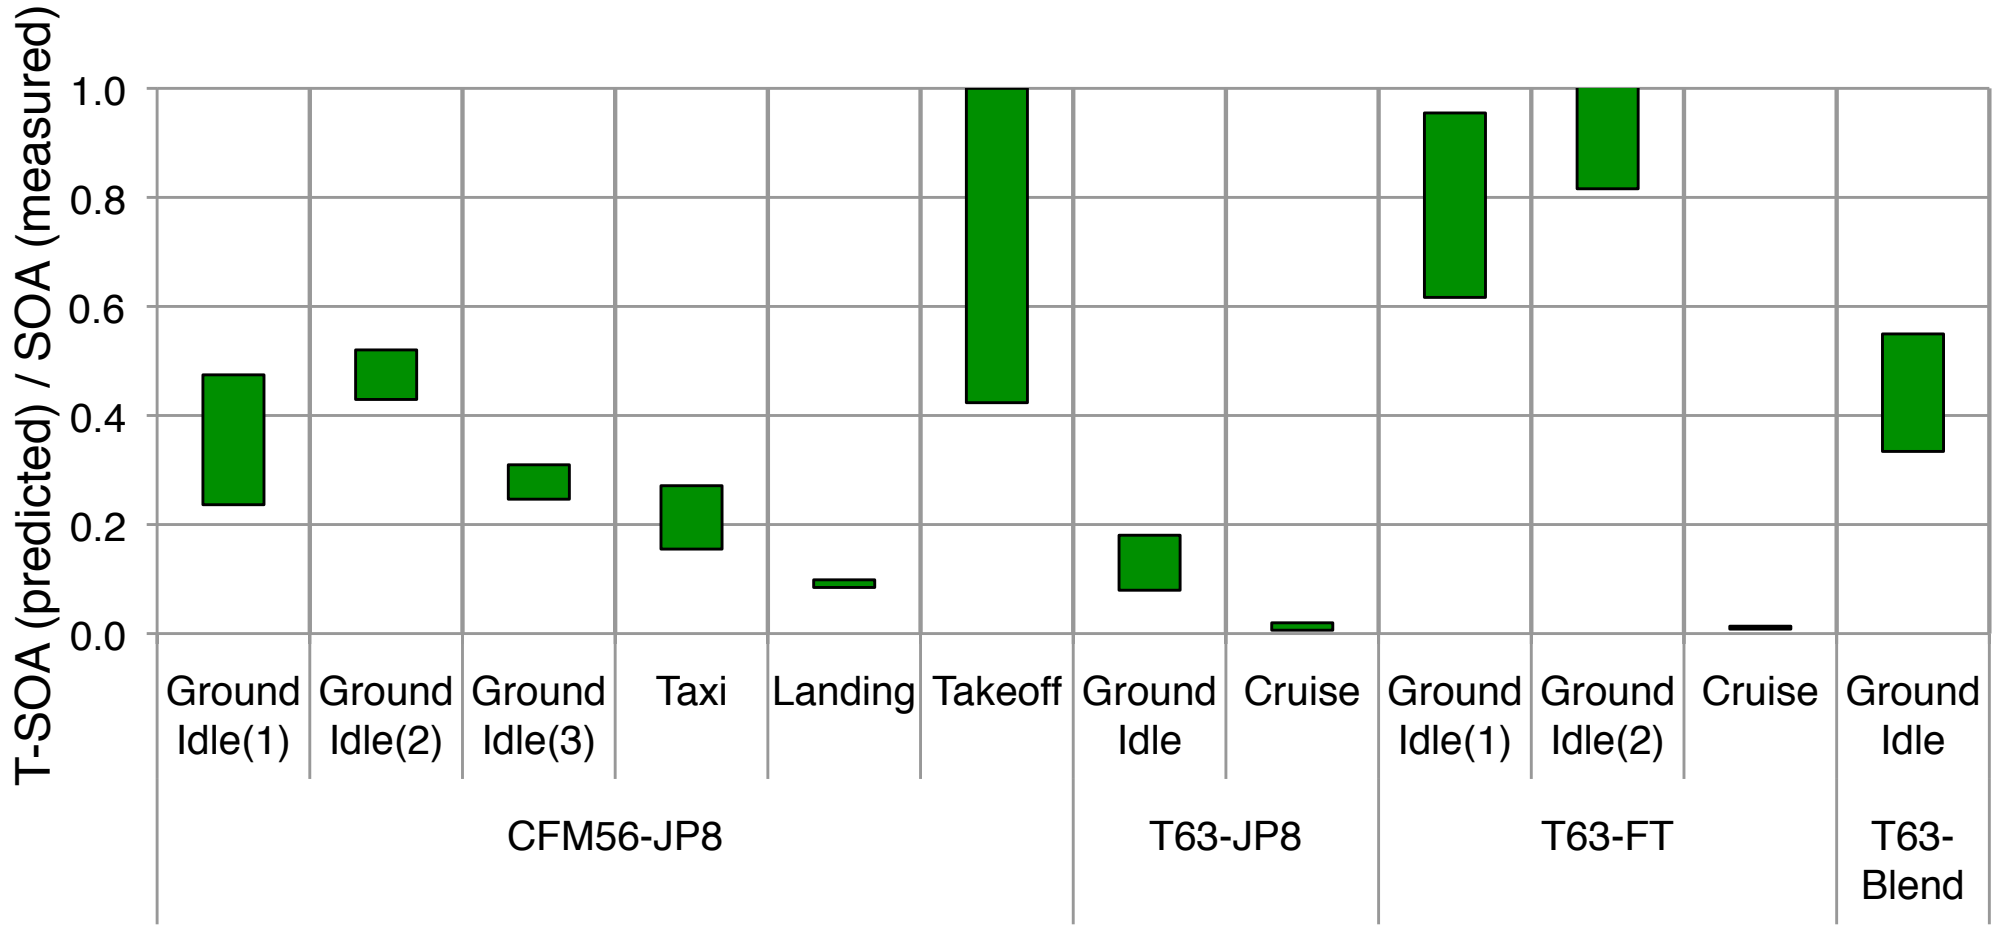

Figure S.1: Ratio of predicted T-SOA to measured SOA for all experiments.

Supplement: Supplementary file 1 [file acp-12-9025-2012-supplement.pdf]
